# Supplementary material for: Association of Rest-Activity Rhythm and Risk of Developing Dementia or Mild Cognitive Impairment in the Middle-Aged and Older Population: Prospective Cohort Study
Source: PubMed Central journal article supplement (PMC11109857; doi:10.2196/55211), 2024-05-07
Supplement: publichealth_v10i1e55211_app2.pdf [file publichealth_v10i1e55211_app2.pdf]

**Multimedia Appendix 2.** Nonparametric analysis of circadian rest-activity rhythms.

Mathematical calculations of interdaily stability (IS), intradaily variability (IV) are as below:

$$IS = \frac{n \sum_{h=1}^{24} (\bar{x}_h - \bar{x})^2}{24 \sum_{i=1}^n (x_i - \bar{x})^2}$$

$$IV = \frac{n \sum_{i=2}^n (x_i - x_{i-1})^2}{(n-1) \sum_{i=1}^n (x_i - \bar{x})^2}$$

where n is the total number of activity count data points,  $\bar{x}$  is the average of the 24-hour activity counts,  $\bar{x}_h$  is the hourly average of activity counts, and  $x_i$  is the individual activity count data point.
