# Supplementary material for: Association of Rest-Activity Rhythm and Risk of Developing Dementia or Mild Cognitive Impairment in the Middle-Aged and Older Population: Prospective Cohort Study
Source: PubMed Central journal article supplement (PMC11109857; doi:10.2196/55211), 2024-05-07
Supplement: publichealth_v10i1e55211_app5.pdf [file publichealth_v10i1e55211_app5.pdf]

**Multimedia Appendix 5.** Effects of rest-activity rhythm (RAR) measures on risk of developing dementia/mild cognitive impairment (MCI) in participants with lower polygenic risk score (PRS) for Alzheimer’s disease (<median PRS) and participants with higher PRS (>median PRS).

| RAR characteristics |                        | Lower PRS        | Higher PRS       | P for interaction |
|---------------------|------------------------|------------------|------------------|-------------------|
|                     | Number of participants | 45,759           | 45,758           |                   |
|                     | Events of dementia/MCI | 207              | 348              |                   |
| Relative Amplitude  | Q1                     | 2.06 (1.36-3.12) | 1.80 (1.32-2.47) | 0.276             |
|                     | Q2                     | 1.25 (0.80-1.97) | 1.32 (0.96-1.83) |                   |
|                     | Q3                     | 1.25 (0.79-1.97) | 0.79 (0.54-1.15) |                   |
|                     | Q4                     | Ref.             | Ref.             |                   |
|                     | Per 1-SD Decrease      | 1.27 (1.17-1.38) | 1.20 (1.12-1.28) |                   |
| M10                 | Q1                     | 2.16 (1.39-3.35) | 1.46 (1.05-2.02) | 0.164             |
|                     | Q2                     | 1.03 (0.62-1.68) | 1.15 (0.81-1.63) |                   |
|                     | Q3                     | 1.14 (0.69-1.87) | 0.98 (0.68-1.41) |                   |
|                     | Q4                     | Ref.             | Ref.             |                   |
|                     | Per 1-SD Decrease      | 1.42 (1.16-1.74) | 1.20 (1.08-1.25) |                   |
| M10 midpoint        | Earlier                | 1.02 (0.74-1.42) | 1.15 (0.90-1.47) | 0.588             |
|                     | Middle                 | Ref.             | Ref.             |                   |
|                     | Later                  | 1.07 (0.76-1.51) | 0.99 (0.75-1.31) |                   |
|                     | Per 1-SD Increase      | 0.91 (0.77-1.08) | 0.93 (0.82-1.06) |                   |
| L5                  | Q1                     | Ref.             | Ref.             | 0.706             |
|                     | Q2                     | 1.02 (0.69-1.51) | 1.38 (1.01-1.88) |                   |
|                     | Q3                     | 0.89 (0.59-1.35) | 1.09 (0.79-1.52) |                   |
|                     | Q4                     | 1.38 (0.95-2.01) | 1.63 (1.20-2.21) |                   |
|                     | Per 1-SD Increase      | 1.16 (1.06-1.28) | 1.15 (1.08-1.22) |                   |
| L5 midpoint         | Earlier                | 1.35 (0.95-1.90) | 0.93 (0.73-1.20) | 0.111             |
|                     | Middle                 | Ref.             | Ref.             |                   |
|                     | Later                  | 1.15 (0.81-1.62) | 0.74 (0.57-0.96) |                   |
|                     | Per 1-SD Increase      | 0.94 (0.82-1.07) | 0.90 (0.82-0.99) |                   |
| IV                  | Q1                     | Ref.             | Ref.             | 0.542             |
|                     | Q2                     | 1.58 (1.02-2.44) | 1.68 (1.22-2.31) |                   |
|                     | Q3                     | 1.42 (0.91-2.21) | 1.33 (0.95-1.85) |                   |
|                     | Q4                     | 1.81 (1.18-2.76) | 1.40 (1.01-1.95) |                   |
|                     | Per 1-SD Increase      | 1.20 (1.05-1.37) | 1.10 (0.99-1.23) |                   |
| IS                  | Q1                     | 0.66 (0.43-1.01) | 1.25 (0.92-1.69) | 0.246             |
|                     | Q2                     | 0.75 (0.51-1.11) | 0.86 (0.63-1.19) |                   |
|                     | Q3                     | 0.86 (0.60-1.22) | 1.12 (0.84-1.49) |                   |
|                     | Q4                     | Ref.             | Ref.             |                   |
|                     | Per 1-SD Decrease      | 0.87 (0.75-1.01) | 1.05 (0.94-1.17) |                   |
| Amplitude           | Q1                     | 2.25 (1.43-3.52) | 1.68 (1.20-2.33) | 0.786             |
|                     | Q2                     | 1.41 (0.87-2.28) | 1.23 (0.87-1.75) |                   |
|                     | Q3                     | 1.37 (0.84-2.23) | 1.17 (0.81-1.67) |                   |
|                     | Q4                     | Ref.             | Ref.             |                   |
|                     | Per 1-SD Decrease      | 1.45 (1.18-1.78) | 1.25 (1.08-1.45) |                   |
| Acrophase           | Earlier                | 0.85 (0.62-1.18) | 1.08 (0.84-1.38) | 0.557             |
|                     | Middle                 | Ref.             | Ref.             |                   |
|                     | Later                  | 0.84 (0.59-1.20) | 0.94 (0.71-1.25) |                   |
|                     | Per 1-SD Increase      | 0.94 (0.81-1.09) | 0.92 (0.82-1.04) |                   |

Models are adjusted for age at the time of actigraphy, sex, education, Townsend Deprivation Index, ethnic background, obesity, sleep apnea, morbidity burdens, circulatory disorders, night shiftwork status, alcohol intake, and smoking status.
