# Supplementary material for: Association of Rest-Activity Rhythm and Risk of Developing Dementia or Mild Cognitive Impairment in the Middle-Aged and Older Population: Prospective Cohort Study
Source: PubMed Central journal article supplement (PMC11109857; doi:10.2196/55211), 2024-05-07
Supplement: publichealth_v10i1e55211_app6.pdf [file publichealth_v10i1e55211_app6.pdf]

**Multimedia Appendix 6.** Effects of rest-activity rhythm (RAR) measures on risk of developing dementia/mild cognitive impairment (MCI) in the younger group (<70 years) and older group (≥ 70 years).

| RAR characteristics       |                        | Younger participants | Older participants | P for interaction |
|---------------------------|------------------------|----------------------|--------------------|-------------------|
|                           | Number of participants | 74,419               | 17,098             |                   |
|                           | Events of dementia/MCI | 242                  | 313                |                   |
| <b>Relative Amplitude</b> | Q1                     | 1.62 (1.12-2.34)     | 2.24 (1.60-3.14)   | 0.989             |
|                           | Q2                     | 1.17 (0.79-1.73)     | 1.63 (1.15-2.31)   |                   |
|                           | Q3                     | 0.97 (0.64-1.47)     | 1.16 (0.80-1.69)   |                   |
|                           | Q4                     | Ref.                 | Ref.               |                   |
|                           | Per 1-SD Decrease      | 1.13 (1.04-1.24)     | 1.25 (1.18-1.33)   |                   |
| <b>M10</b>                | Q1                     | 2.12 (1.46-3.06)     | 1.75 (1.26-2.43)   | 0.014             |
|                           | Q2                     | 1.19 (0.79-1.80)     | 1.32 (0.94-1.85)   |                   |
|                           | Q3                     | 0.96 (0.62-1.48)     | 1.15 (0.81-1.63)   |                   |
|                           | Q4                     | Ref.                 | Ref.               |                   |
|                           | Per 1-SD Decrease      | 1.33 (1.13-1.57)     | 1.35 (1.17-1.55)   |                   |
| <b>M10 midpoint</b>       | Earlier                | 0.80 (0.59-1.06)     | 1.24 (0.94-1.63)   | 0.387             |
|                           | Middle                 | Ref.                 | Ref.               |                   |
|                           | Later                  | 0.63 (0.46-0.87)     | 1.18 (0.89-1.57)   |                   |
|                           | Per 1-SD Increase      | 0.85 (0.74-0.98)     | 0.95 (0.84-1.07)   |                   |
| <b>L5</b>                 | Q1                     | Ref.                 | Ref.               | 0.352             |
|                           | Q2                     | 0.96 (0.67-1.39)     | 1.36 (0.98-1.89)   |                   |
|                           | Q3                     | 0.84 (0.58-1.22)     | 1.18 (0.84-1.66)   |                   |
|                           | Q4                     | 1.07 (0.76-1.52)     | 1.61 (1.17-2.21)   |                   |
|                           | Per 1-SD Increase      | 1.05 (0.94-1.17)     | 1.16 (1.10-1.23)   |                   |
| <b>L5 midpoint</b>        | Earlier                | 1.18 (0.86-1.61)     | 1.10 (0.85-1.43)   | 0.495             |
|                           | Middle                 | Ref.                 | Ref.               |                   |
|                           | Later                  | 0.97 (0.71-1.33)     | 0.88 (0.67-1.16)   |                   |
|                           | Per 1-SD Increase      | 0.90 (0.80-1.01)     | 0.92 (0.83-1.02)   |                   |
| <b>IV</b>                 | Q1                     | Ref.                 | Ref.               | 0.230             |
|                           | Q2                     | 1.71 (1.19-2.47)     | 1.95 (1.38-2.76)   |                   |
|                           | Q3                     | 1.29 (0.87-1.90)     | 1.45 (1.00-2.09)   |                   |
|                           | Q4                     | 1.29 (0.88-1.90)     | 1.98 (1.40-2.80)   |                   |
|                           | Per 1-SD Increase      | 1.07 (0.95-1.22)     | 1.20 (1.07-1.33)   |                   |
| <b>IS</b>                 | Q1                     | 0.71 (0.49-1.03)     | 1.01 (0.74-1.39)   | 0.436             |
|                           | Q2                     | 0.81 (0.56-1.15)     | 0.82 (0.59-1.13)   |                   |
|                           | Q3                     | 0.91 (0.65-1.29)     | 0.92 (0.67-1.26)   |                   |
|                           | Q4                     | Ref.                 | Ref.               |                   |
|                           | Per 1-SD Decrease      | 0.86 (0.75-0.98)     | 0.99 (0.88-1.12)   |                   |
| <b>Amplitude</b>          | Q1                     | 2.06 (1.42-3.01)     | 1.92 (1.38-2.68)   | 0.479             |
|                           | Q2                     | 1.26 (0.83-1.90)     | 1.31 (0.92-1.86)   |                   |
|                           | Q3                     | 1.17 (0.77-1.78)     | 1.32 (0.93-1.87)   |                   |
|                           | Q4                     | Ref.                 | Ref.               |                   |
|                           | Per 1-SD Decrease      | 1.26 (1.07-1.49)     | 1.44 (1.24-1.68)   |                   |
| <b>Acrophase</b>          | Earlier                | 0.92 (0.68-1.23)     | 1.05 (0.80-1.39)   | 0.222             |
|                           | Middle                 | Ref.                 | Ref.               |                   |
|                           | Later                  | 0.66 (0.48-0.91)     | 1.04 (0.79-1.37)   |                   |
|                           | Per 1-SD Increase      | 0.82 (0.72-0.94)     | 0.96 (0.86-1.08)   |                   |

Models are adjusted for sex, education, Townsend Deprivation Index, ethnic background, obesity, sleep apnea, morbidity burdens, circulatory disorders, night shiftwork status, alcohol intake, smoking status, and polygenic risk score of for Alzheimer's disease.
